# Supplementary material for: Circadian Clock Gene Bmal1 Regulates Bilirubin Detoxification: A Potential Mechanism of Feedback Control of Hyperbilirubinemia
Source: PubMed Central journal article supplement (PMC6691581; doi:10.7150/thno.35773), 2019-07-09
Supplement: thnov09p5122s1.pdf [file thnov09p5122s1.pdf]

Supplemental Information

**Circadian clock gene Bmal1 regulates bilirubin detoxification: a potential  
mechanism of feedback control of hyperbilirubinemia**

**Supplementary Table 1.** Mouse primer sequences for quantitative real-time PCR (qPCR)

| <b>Gene</b>    | <b>Forward ( 5'-3' sequence)</b> | <b>Reverse ( 5'-3' sequence)</b> |
|----------------|----------------------------------|----------------------------------|
| <i>Bmal1</i>   | CTCCAGGAGGCAAGAAGATTC            | ATAGTCCAGTGAAGGAATG              |
| <i>Ugt1a1</i>  | CACTGGCTGAGTATGCTTGG             | CTTCTGGAATGGCACAGGGAA            |
| <i>Mrp2</i>    | AGCCGACCTGCCTCTTTGTT             | CAAGAGCCAAAGAAAGCCCAA            |
| <i>Mrp3</i>    | CTGCCCCAGACGGACTTTAT             | TCTGGTGCGTAGTTTCGGAG             |
| <i>Sloc1a1</i> | CAGGGGCATGCAGGATGTAT             | GTCTGGAGAGTGGATGTCGC             |
| <i>Sloc1b2</i> | CACCGACCAAAGCTGATTGG             | AGAAATGTGGCAACGCAGTC             |
| <i>Homx1</i>   | CCTTCTGGTATGGGCCTCAC             | CCTCGTGGAGACGCTTTACA             |
| <i>Blvra</i>   | ACGAGAACTTGGGAGCCTTG             | AGGCGACATCAACCTCTTGG             |
| <i>E4bp4</i>   | CTTTCAGGACTACCAGACATCCAA         | GATGCAACTTCCGGCTACCA             |
| <i>Pck1</i>    | ATGAAAGGCCGCACCATGTA             | GCACAGATATGCCCATCCGA             |
| <i>G6pase</i>  | TGGTAGCCCTGTCTTTCTTTG            | TTCCAGCATTACACTTTCCT             |
| <i>Cyp4a14</i> | CCCAAAGGTATCACAGCCACAA           | CAGCAATTCAAAGCGGAGCAG            |
| <i>Ppib</i>    | CTCTCGGAGCGCAATATGAAG            | GCAAAGGAAGACGACGGAG              |

**Supplementary Table 2.** Primer sequences for ChIP assays.

| <b>Gene</b>               | <b>Forward ( 5'-3' sequence)</b> | <b>Reverse ( 5'-3' sequence)</b> |
|---------------------------|----------------------------------|----------------------------------|
| Ugt1a1-E-box              | TCATGGGGCACAATCAATCA             | ACGGAAGAAGCAGAAGCAAAC            |
| Ugt1a1-nonspecific region | GCTGCCATCTTGAAACCCAG             | AATCTCGGGTCCTTATGCTTGC           |
| Mrp2-E-box-1              | ACATCTCTGTGAACTCTTAACCG          | TAATGCAGTTGGCAGGTCGG             |
| Mrp2-E-box-2              | GAGAAGTGATAAGCCTCCAGT            | GAATGCTATGTCATCCCAGTGAGC         |
| Mrp2-nonspecific region   | GTTTCGCTATCACATTTCA              | CTCATTGCCTTCACTTCA               |

**Supplementary Table 3.** Oligonucleotide sequences for EMSA assays

| <b>Oligonucleotide</b> | <b>Forward ( 5'-3' sequence)</b> | <b>Reverse ( 5'-3' sequence)</b> |
|------------------------|----------------------------------|----------------------------------|
| Mrp2-E-box1(biotin)    | TAAAACCCACATGCAGGGAT             | ATCCCTGCATGTGGGGTTTTA            |
| Mrp2-E-box1(cold)      | TAAAACCCACATGCAGGGAT             | ATCCCTGCATGTGGGGTTTTA            |
| Mrp2-E-box1(mut)       | TAAAACCCTGTGCACAGGGAT            | ATCCCTGTGCACAGGGTTTTA            |
| Mrp2-E-box2(biotin)    | TCCCAGTCACATGTCTGCTCA            | TGAGCAGACATGTGACTGGGA            |
| Mrp2-E-box2(cold)      | TCCCAGTCACATGTCTGCTCA            | TGAGCAGACATGTGACTGGGA            |
| Mrp2-E-box2(mut)       | TCCCAGTAGTCTTCTGCTCA             | TGAGCAGAAGCACTACTGGGA            |
| Ugt1a1-E-box(biotin)   | TTCGGATGTTCCAGCTGCCTTTATCTCC     | GGAGATAAAGGCAGCTGGAACATCCGAA     |
| Ugt1a1-E-box(cold)     | TTCGGATGTTCCAGCTGCCTTTATCTCC     | GGAGATAAAGGCAGCTGGAACATCCGAA     |
| Ugt1a1-E-box(mut)      | TTCGGATGTTTCATCGATCCTTTATCTCC    | GGAGATAAAGGATCGATGAACATCCGAA     |

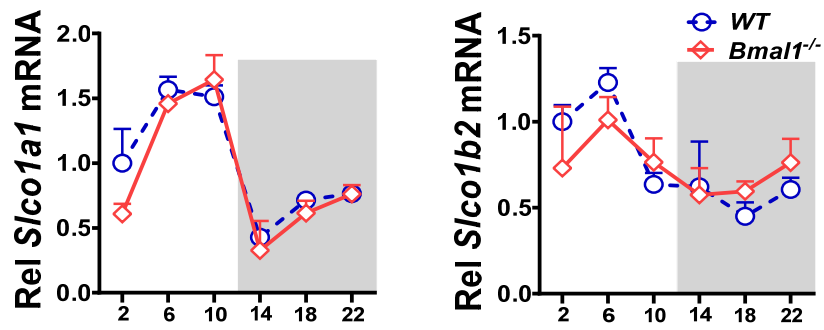

**Supplementary Figure 1. Bmal1 ablation does not affect *Slco1a1* and *Slco1b2* expressions.** (A) Circadian mRNA levels of *Slco1a1* and *Slco1b2* in the livers of WT and *Bmal1*<sup>-/-</sup> mice measured by qPCR. Data are mean ± SD (n=5).

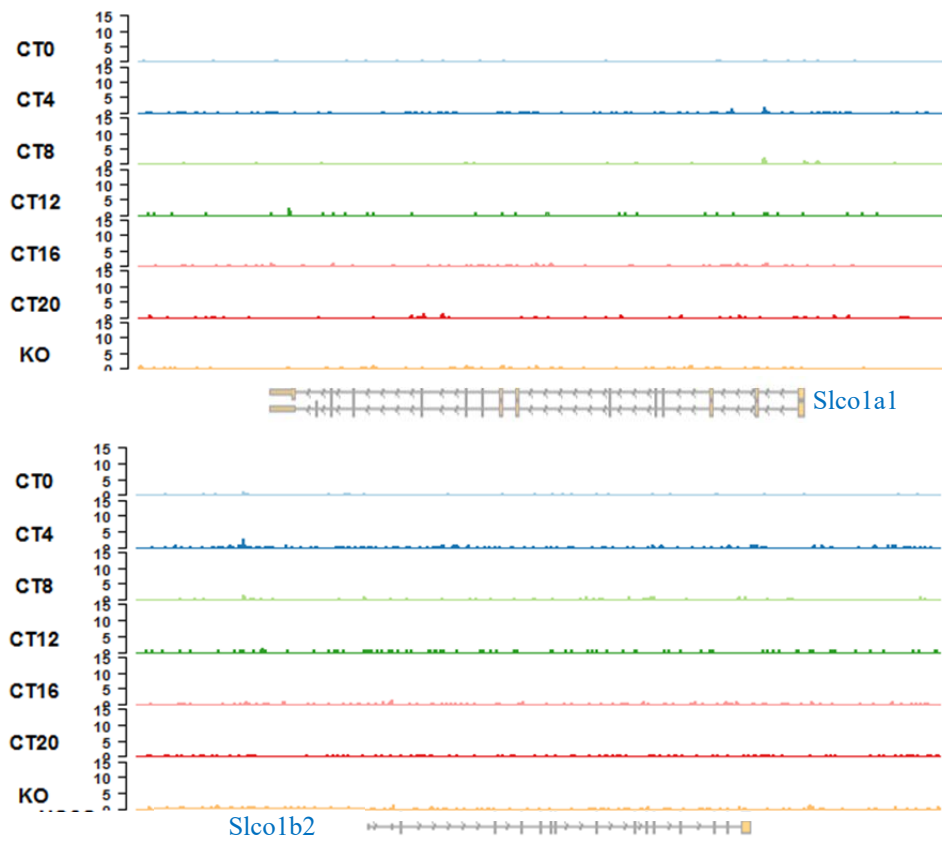

**Supplementary Figure 2.** ChIP-sequencing for circadian Bmal1 binding to *Slco1a1* and *Slco1b2*. No obvious peaks were found in the data. ChIP-sequencing traces were generated from GSE39977.

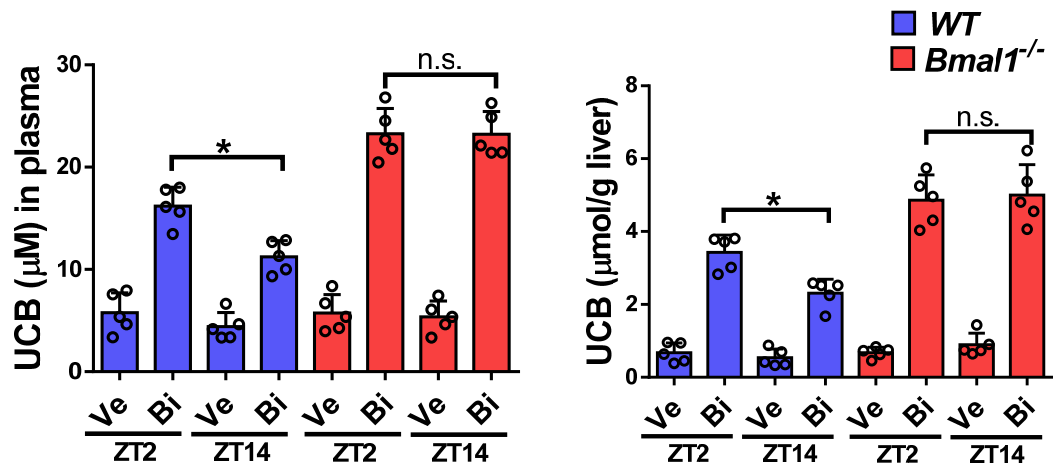

**Supplementary Figure 3.** Measurements of UCB in plasma and livers of bilirubin or vehicle-treated mice at ZT2 or ZT14. Data are mean  $\pm$  SD ( $n=5$ ). \* $P < 0.05$  (t test). Ve: vehicle; Bi: bilirubin.

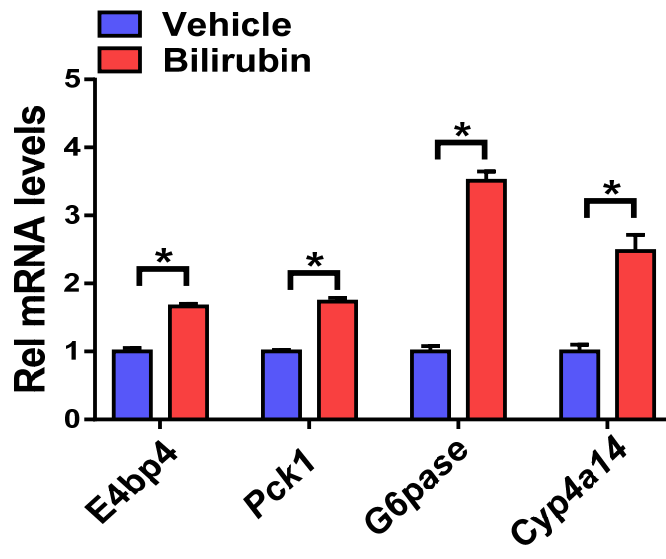

**Supplementary Figure 4.** qPCR measurements of mRNA levels of *E4bp4*, *Pck1*, *G6pase* and *Cyp4a14* in Hepa1-6 cells. Data are mean  $\pm$  SD (n=5). \*P < 0.05 (t test).



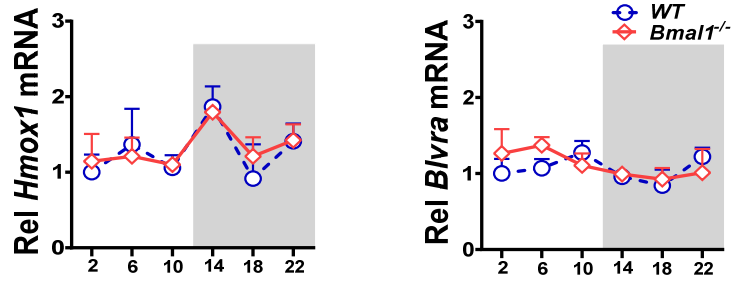

**Supplementary Figure 5. *Bmal1* ablation does not affect *Hmox1* and *Blvra* expressions.** (A) Circadian mRNA levels of *Hmox1* and *Blvra* in the livers of WT and *Bmal1*<sup>-/-</sup> mice measured by qPCR. Data are mean  $\pm$  SD ( $n=5$ ).

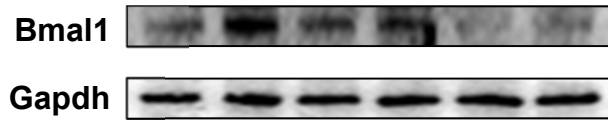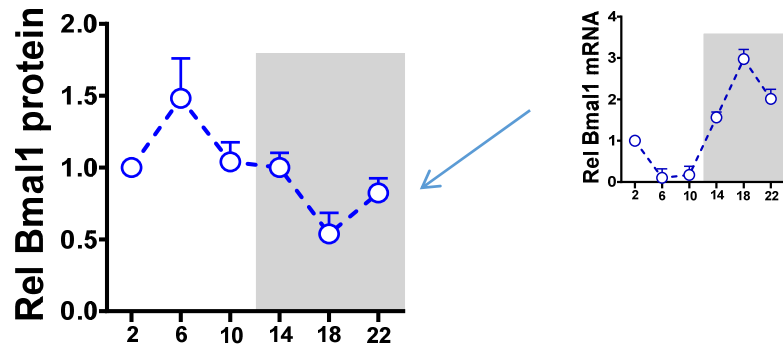

**Supplementary Figure 6.** Circadian protein (left panel) and mRNA (right panel) expression of Bmal1 in the livers of Wild-type mice.

### 6-B

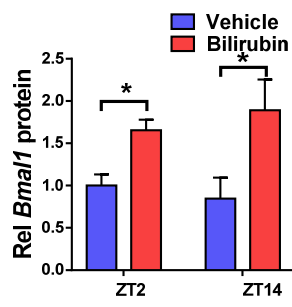

### 6-E

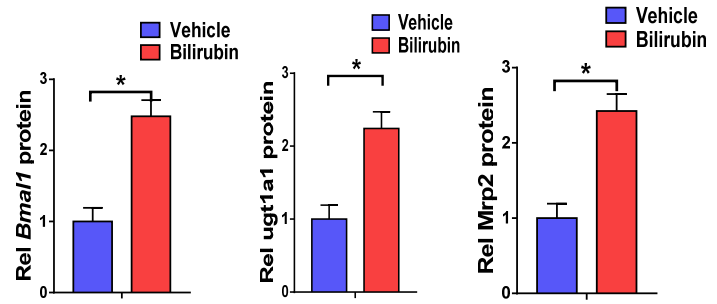

### 6-J

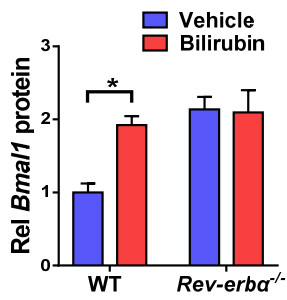

### 6-K

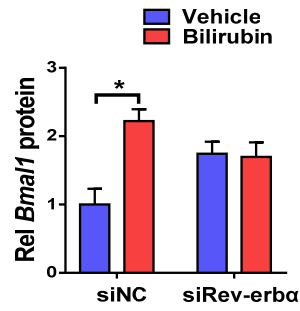

Supplementary Figure 7. Quantification of the blot band density for Figure 6.
